# Supplementary material
Source: publisher figshare collection journal article supplement (https://acs.figshare.com/ndownloader/files/4707913)
Supplement: Supplementary file 1 [file 4707913]

  
data_jh1 
  
_audit_creation_method            SHELXL-97 
_chemical_name_systematic 
; 
 ? 
; 
_chemical_name_common             ? 
_chemical_melting_point           ? 
_chemical_formula_moiety          ? 
_chemical_formula_sum 
 'C22 H22 O5' 
_chemical_formula_weight          366.40 
  
loop_ 
 _atom_type_symbol 
 _atom_type_description 
 _atom_type_scat_dispersion_real 
 _atom_type_scat_dispersion_imag 
 _atom_type_scat_source 
 'C'  'C'   0.0033   0.0016 
 'International Tables Vol C Tables 4.2.6.8 and 6.1.1.4' 
 'H'  'H'   0.0000   0.0000 
 'International Tables Vol C Tables 4.2.6.8 and 6.1.1.4' 
 'O'  'O'   0.0106   0.0060 
 'International Tables Vol C Tables 4.2.6.8 and 6.1.1.4' 
  
_symmetry_cell_setting            Monoclinic 
_symmetry_space_group_name_H-M    C2/c
_symmetry_space_group_name_Hall   '-C 2yc'  
  
loop_ 
 _symmetry_equiv_pos_as_xyz 
 'x, y, z' 
 '-x, y, -z+1/2' 
 'x+1/2, y+1/2, z' 
 '-x+1/2, y+1/2, -z+1/2' 
 '-x, -y, -z' 
 'x, -y, z-1/2' 
 '-x+1/2, -y+1/2, -z' 
 'x+1/2, -y+1/2, z-1/2' 
  
_cell_length_a                    9.7786(9) 
_cell_length_b                    26.342(2) 
_cell_length_c                    13.4644(12) 
_cell_angle_alpha                 90.00 
_cell_angle_beta                  102.4760(10) 
_cell_angle_gamma                 90.00 
_cell_volume                      3386.4(5) 
_cell_formula_units_Z             8 
_cell_measurement_temperature     173(2) 
_cell_measurement_reflns_used     6436 
_cell_measurement_theta_min       2.19 
_cell_measurement_theta_max       28.05 
  
_exptl_crystal_description        block 
_exptl_crystal_colour             colorless 
_exptl_crystal_size_max           0.32 
_exptl_crystal_size_mid           0.26 
_exptl_crystal_size_min           0.22 
_exptl_crystal_density_meas       ?
_exptl_crystal_density_diffrn     1.437 
_exptl_crystal_density_method     'not measured' 
_exptl_crystal_F_000              1552 
_exptl_absorpt_coefficient_mu     0.101 
_exptl_absorpt_correction_type    'multi-scan' 
_exptl_absorpt_correction_T_min   0.968 
_exptl_absorpt_correction_T_max   0.978 
_exptl_absorpt_process_details    SADABS 
  
_exptl_special_details 
; 
 ? 
; 
  
_diffrn_ambient_temperature       173(2) 
_diffrn_radiation_wavelength      0.71073 
_diffrn_radiation_type            MoK\a 
_diffrn_radiation_source          'fine-focus sealed tube' 
_diffrn_radiation_monochromator   graphite 
_diffrn_measurement_device_type   'CCD area detector' 
_diffrn_measurement_method        'phi and omega scans' 
_diffrn_detector_area_resol_mean  ? 
_diffrn_standards_number          ? 
_diffrn_standards_interval_count  ? 
_diffrn_standards_interval_time   ? 
_diffrn_standards_decay_%         ? 
_diffrn_reflns_number             14936 
_diffrn_reflns_av_R_equivalents   0.0223 
_diffrn_reflns_av_sigmaI/netI     0.0205 
_diffrn_reflns_limit_h_min        -12 
_diffrn_reflns_limit_h_max        12 
_diffrn_reflns_limit_k_min        -34 
_diffrn_reflns_limit_k_max        30 
_diffrn_reflns_limit_l_min        -17 
_diffrn_reflns_limit_l_max        17 
_diffrn_reflns_theta_min          1.55 
_diffrn_reflns_theta_max          28.24 
_reflns_number_total              3999 
_reflns_number_gt                 3460 
_reflns_threshold_expression      >2sigma(I) 
  
_computing_data_collection        'Bruker SMART' 
_computing_cell_refinement        'Bruker SMART' 
_computing_data_reduction         'Bruker SAINT' 
_computing_structure_solution     'SHELXS-97 (Sheldrick, 1990)' 
_computing_structure_refinement   'SHELXL-97 (Sheldrick, 1997)' 
_computing_molecular_graphics     'Bruker SHELXTL' 
_computing_publication_material   'Bruker SHELXTL' 
  
_refine_special_details 
; 
 Refinement of F^2^ against ALL reflections.  The weighted R-factor wR and 
 goodness of fit S are based on F^2^, conventional R-factors R are based 
 on F, with F set to zero for negative F^2^. The threshold expression of 
 F^2^ > 2sigma(F^2^) is used only for calculating R-factors(gt) etc. and is 
 not relevant to the choice of reflections for refinement.  R-factors based 
 on F^2^ are statistically about twice as large as those based on F, and R- 
 factors based on ALL data will be even larger. 

 Highly disordered diethyl ether (OC4H10) solvent molecules were treated 
 by SQUEEZE [Van der Sluis,P. & Spek, A.L. (1990) Acta Cryst., Sect.A, A46, 
 194-201.]. Corrections of the X-ray data by SQUEEZE, 39 electrons per 
 symmetrically independent part, was close to the required  value 
 of 40 electrons per one OC4H10 solvent molecule in symmetrically 
 independent part.

; 
  
_refine_ls_structure_factor_coef  Fsqd 
_refine_ls_matrix_type            full 
_refine_ls_weighting_scheme       calc 
_refine_ls_weighting_details 
 'calc w=1/[\s^2^(Fo^2^)+(0.0735P)^2^+1.4730P] where P=(Fo^2^+2Fc^2^)/3' 
_atom_sites_solution_primary      direct 
_atom_sites_solution_secondary    difmap 
_atom_sites_solution_hydrogens    geom 
_refine_ls_hydrogen_treatment     refall 
_refine_ls_extinction_method      none 
_refine_ls_extinction_coef        ? 
_refine_ls_number_reflns          3999 
_refine_ls_number_parameters      247 
_refine_ls_number_restraints      0 
_refine_ls_R_factor_all           0.0508 
_refine_ls_R_factor_gt            0.0456 
_refine_ls_wR_factor_ref          0.1295 
_refine_ls_wR_factor_gt           0.1260 
_refine_ls_goodness_of_fit_ref    1.060 
_refine_ls_restrained_S_all       1.060 
_refine_ls_shift/su_max           0.000 
_refine_ls_shift/su_mean          0.000 
  
loop_ 
 _atom_site_label 
 _atom_site_type_symbol 
 _atom_site_fract_x 
 _atom_site_fract_y 
 _atom_site_fract_z 
 _atom_site_U_iso_or_equiv 
 _atom_site_adp_type 
 _atom_site_occupancy 
 _atom_site_symmetry_multiplicity 
 _atom_site_calc_flag 
 _atom_site_refinement_flags 
 _atom_site_disorder_assembly 
 _atom_site_disorder_group 
O1 O 0.02596(10) 0.26990(3) -0.00494(7) 0.0310(2) Uani 1 1 d . . . 
O2 O 0.15224(12) 0.26633(4) -0.11984(8) 0.0419(3) Uani 1 1 d . . . 
O3 O 0.17361(10) 0.06339(3) -0.11379(7) 0.0310(2) Uani 1 1 d . . . 
O4 O 0.16916(11) 0.12040(4) -0.23309(7) 0.0371(2) Uani 1 1 d . . . 
C1 C 0.07783(13) 0.24380(5) -0.07499(9) 0.0267(3) Uani 1 1 d . . . 
C2 C 0.04035(13) 0.18871(4) -0.09398(9) 0.0229(2) Uani 1 1 d . . . 
C3 C -0.01915(12) 0.16161(4) -0.01068(9) 0.0231(2) Uani 1 1 d . . . 
C4 C -0.08063(13) 0.19550(5) 0.05698(9) 0.0256(3) Uani 1 1 d . . . 
C5 C -0.16193(15) 0.17713(6) 0.12232(10) 0.0343(3) Uani 1 1 d . . . 
C6 C -0.21388(15) 0.20976(6) 0.18641(10) 0.0390(3) Uani 1 1 d . . . 
C7 C -0.18708(15) 0.26133(6) 0.18484(10) 0.0388(3) Uani 1 1 d . . . 
C8 C -0.10839(14) 0.28053(6) 0.11937(10) 0.0337(3) Uani 1 1 d . . . 
C9 C -0.05607(12) 0.24715(5) 0.05682(9) 0.0263(3) Uani 1 1 d . . . 
C10 C 0.17012(13) 0.11247(5) -0.14519(9) 0.0263(3) Uani 1 1 d . . . 
C11 C 0.17259(12) 0.15412(4) -0.06807(9) 0.0236(2) Uani 1 1 d . . . 
C12 C 0.13032(12) 0.13872(4) 0.03191(8) 0.0234(2) Uani 1 1 d . . . 
C13 C 0.14337(12) 0.08371(4) 0.05760(9) 0.0242(2) Uani 1 1 d . . . 
C14 C 0.13365(14) 0.06488(5) 0.15289(10) 0.0308(3) Uani 1 1 d . . . 
C15 C 0.14656(14) 0.01331(5) 0.17418(11) 0.0346(3) Uani 1 1 d . . . 
C16 C 0.17192(14) -0.02009(5) 0.10087(11) 0.0338(3) Uani 1 1 d . . . 
C17 C 0.18310(14) -0.00242(5) 0.00561(11) 0.0316(3) Uani 1 1 d . . . 
C18 C 0.16716(12) 0.04910(5) -0.01448(9) 0.0260(3) Uani 1 1 d . . . 
H2 H -0.0085(16) 0.1867(6) -0.1608(12) 0.029(4) Uiso 1 1 d . . . 
H3 H -0.0850(16) 0.1364(6) -0.0421(11) 0.026(3) Uiso 1 1 d . . . 
H5 H -0.1836(18) 0.1397(7) 0.1198(13) 0.043(4) Uiso 1 1 d . . . 
H6 H -0.271(2) 0.1966(7) 0.2295(15) 0.052(5) Uiso 1 1 d . . . 
H7 H -0.2227(19) 0.2831(7) 0.2269(14) 0.048(5) Uiso 1 1 d . . . 
H8 H -0.0901(19) 0.3160(7) 0.1122(13) 0.041(4) Uiso 1 1 d . . . 
H11 H 0.2634(16) 0.1714(6) -0.0609(11) 0.025(3) Uiso 1 1 d . . . 
H12 H 0.1809(16) 0.1588(6) 0.0886(12) 0.031(4) Uiso 1 1 d . . . 
H14 H 0.1203(16) 0.0898(6) 0.2048(12) 0.032(4) Uiso 1 1 d . . . 
H15 H 0.1373(19) 0.0006(7) 0.2362(14) 0.044(5) Uiso 1 1 d . . . 
H16 H 0.181(2) -0.0577(8) 0.1119(14) 0.051(5) Uiso 1 1 d . . . 
H17 H 0.1986(19) -0.0245(7) -0.0505(13) 0.043(5) Uiso 1 1 d . . . 
  
loop_ 
 _atom_site_aniso_label 
 _atom_site_aniso_U_11 
 _atom_site_aniso_U_22 
 _atom_site_aniso_U_33 
 _atom_site_aniso_U_23 
 _atom_site_aniso_U_13 
 _atom_site_aniso_U_12 
O1 0.0358(5) 0.0224(4) 0.0377(5) -0.0051(3) 0.0144(4) -0.0026(3) 
O2 0.0566(7) 0.0275(5) 0.0497(6) 0.0052(4) 0.0290(5) -0.0041(4) 
O3 0.0443(5) 0.0225(4) 0.0281(5) -0.0016(3) 0.0123(4) 0.0016(4) 
O4 0.0536(6) 0.0342(5) 0.0275(5) 0.0007(4) 0.0175(4) 0.0092(4) 
C1 0.0319(6) 0.0217(6) 0.0275(6) 0.0024(4) 0.0086(5) 0.0009(4) 
C2 0.0299(6) 0.0209(5) 0.0187(5) -0.0004(4) 0.0074(4) -0.0001(4) 
C3 0.0282(6) 0.0204(5) 0.0216(5) -0.0005(4) 0.0073(4) -0.0029(4) 
C4 0.0273(6) 0.0290(6) 0.0209(5) 0.0001(4) 0.0061(4) 0.0027(5) 
C5 0.0370(7) 0.0391(7) 0.0297(6) 0.0058(5) 0.0141(5) 0.0051(6) 
C6 0.0364(7) 0.0582(9) 0.0258(6) 0.0031(6) 0.0139(5) 0.0098(6) 
C7 0.0333(7) 0.0569(9) 0.0258(6) -0.0102(6) 0.0059(5) 0.0128(6) 
C8 0.0323(6) 0.0348(7) 0.0323(7) -0.0100(5) 0.0034(5) 0.0047(5) 
C9 0.0256(6) 0.0298(6) 0.0236(6) -0.0034(4) 0.0052(5) 0.0013(5) 
C10 0.0287(6) 0.0244(6) 0.0276(6) -0.0002(4) 0.0102(5) 0.0029(4) 
C11 0.0284(6) 0.0200(5) 0.0242(5) -0.0002(4) 0.0095(4) -0.0015(4) 
C12 0.0286(6) 0.0210(5) 0.0204(5) -0.0009(4) 0.0053(4) -0.0020(4) 
C13 0.0245(5) 0.0225(6) 0.0253(6) 0.0019(4) 0.0042(4) -0.0022(4) 
C14 0.0323(6) 0.0322(7) 0.0269(6) 0.0060(5) 0.0041(5) -0.0016(5) 
C15 0.0328(7) 0.0343(7) 0.0338(7) 0.0138(5) 0.0007(5) -0.0027(5) 
C16 0.0278(6) 0.0249(6) 0.0444(8) 0.0104(5) -0.0018(5) -0.0034(5) 
C17 0.0295(6) 0.0223(6) 0.0412(7) -0.0008(5) 0.0033(5) -0.0005(5) 
C18 0.0257(6) 0.0238(6) 0.0282(6) 0.0018(4) 0.0051(4) -0.0006(4) 
  
_geom_special_details 
; 
 All esds (except the esd in the dihedral angle between two l.s. planes) 
 are estimated using the full covariance matrix.  The cell esds are taken 
 into account individually in the estimation of esds in distances, angles 
 and torsion angles; correlations between esds in cell parameters are only 
 used when they are defined by crystal symmetry.  An approximate (isotropic) 
 treatment of cell esds is used for estimating esds involving l.s. planes. 
; 
  
loop_ 
 _geom_bond_atom_site_label_1 
 _geom_bond_atom_site_label_2 
 _geom_bond_distance 
 _geom_bond_site_symmetry_2 
 _geom_bond_publ_flag 
O1 C1 1.3514(14) . ? 
O1 C9 1.4079(15) . ? 
O2 C1 1.1983(15) . ? 
O3 C10 1.3584(15) . ? 
O3 C18 1.4037(15) . ? 
O4 C10 1.1999(15) . ? 
C1 C2 1.5052(16) . ? 
C2 C3 1.5454(15) . ? 
C2 C11 1.5585(16) . ? 
C2 H2 0.925(16) . ? 
C3 C4 1.4917(15) . ? 
C3 C12 1.5706(17) . ? 
C3 H3 0.957(15) . ? 
C4 C9 1.3817(18) . ? 
C4 C5 1.3936(17) . ? 
C5 C6 1.3894(19) . ? 
C5 H5 1.007(18) . ? 
C6 C7 1.385(2) . ? 
C6 H6 0.95(2) . ? 
C7 C8 1.385(2) . ? 
C7 H7 0.925(19) . ? 
C8 C9 1.3894(17) . ? 
C8 H8 0.961(18) . ? 
C10 C11 1.5072(16) . ? 
C11 C12 1.5454(15) . ? 
C11 H11 0.985(15) . ? 
C12 C13 1.4889(16) . ? 
C12 H12 0.972(16) . ? 
C13 C18 1.3873(16) . ? 
C13 C14 1.3977(16) . ? 
C14 C15 1.3884(19) . ? 
C14 H14 0.988(16) . ? 
C15 C16 1.384(2) . ? 
C15 H15 0.922(18) . ? 
C16 C17 1.391(2) . ? 
C16 H16 1.00(2) . ? 
C17 C18 1.3861(17) . ? 
C17 H17 0.990(18) . ? 
  
loop_ 
 _geom_angle_atom_site_label_1 
 _geom_angle_atom_site_label_2 
 _geom_angle_atom_site_label_3 
 _geom_angle 
 _geom_angle_site_symmetry_1 
 _geom_angle_site_symmetry_3 
 _geom_angle_publ_flag 
C1 O1 C9 122.91(10) . . ? 
C10 O3 C18 123.27(9) . . ? 
O2 C1 O1 117.39(11) . . ? 
O2 C1 C2 122.96(11) . . ? 
O1 C1 C2 119.65(10) . . ? 
C1 C2 C3 115.99(9) . . ? 
C1 C2 C11 111.45(10) . . ? 
C3 C2 C11 89.53(8) . . ? 
C1 C2 H2 106.1(9) . . ? 
C3 C2 H2 118.9(9) . . ? 
C11 C2 H2 114.4(9) . . ? 
C4 C3 C2 115.56(9) . . ? 
C4 C3 C12 118.22(10) . . ? 
C2 C3 C12 88.61(8) . . ? 
C4 C3 H3 111.3(9) . . ? 
C2 C3 H3 108.8(9) . . ? 
C12 C3 H3 112.3(9) . . ? 
C9 C4 C5 117.78(11) . . ? 
C9 C4 C3 119.69(10) . . ? 
C5 C4 C3 122.53(12) . . ? 
C6 C5 C4 120.81(14) . . ? 
C6 C5 H5 121.6(10) . . ? 
C4 C5 H5 117.6(10) . . ? 
C7 C6 C5 120.11(13) . . ? 
C7 C6 H6 120.4(11) . . ? 
C5 C6 H6 119.5(12) . . ? 
C6 C7 C8 120.07(12) . . ? 
C6 C7 H7 120.1(12) . . ? 
C8 C7 H7 119.8(12) . . ? 
C7 C8 C9 118.85(13) . . ? 
C7 C8 H8 124.1(10) . . ? 
C9 C8 H8 117.0(10) . . ? 
C4 C9 C8 122.37(12) . . ? 
C4 C9 O1 122.79(10) . . ? 
C8 C9 O1 114.84(11) . . ? 
O4 C10 O3 117.84(11) . . ? 
O4 C10 C11 123.25(11) . . ? 
O3 C10 C11 118.87(10) . . ? 
C10 C11 C12 116.20(9) . . ? 
C10 C11 C2 112.47(10) . . ? 
C12 C11 C2 89.05(8) . . ? 
C10 C11 H11 106.6(8) . . ? 
C12 C11 H11 116.2(8) . . ? 
C2 C11 H11 116.0(9) . . ? 
C13 C12 C11 115.62(9) . . ? 
C13 C12 C3 119.00(10) . . ? 
C11 C12 C3 89.09(8) . . ? 
C13 C12 H12 110.1(9) . . ? 
C11 C12 H12 110.8(9) . . ? 
C3 C12 H12 110.7(9) . . ? 
C18 C13 C14 117.64(11) . . ? 
C18 C13 C12 119.73(10) . . ? 
C14 C13 C12 122.63(11) . . ? 
C15 C14 C13 121.04(13) . . ? 
C15 C14 H14 121.6(9) . . ? 
C13 C14 H14 117.4(9) . . ? 
C16 C15 C14 119.79(12) . . ? 
C16 C15 H15 118.9(11) . . ? 
C14 C15 H15 121.3(11) . . ? 
C15 C16 C17 120.47(12) . . ? 
C15 C16 H16 123.1(11) . . ? 
C17 C16 H16 116.4(11) . . ? 
C18 C17 C16 118.66(13) . . ? 
C18 C17 H17 117.1(10) . . ? 
C16 C17 H17 124.3(10) . . ? 
C17 C18 C13 122.39(12) . . ? 
C17 C18 O3 114.98(11) . . ? 
C13 C18 O3 122.62(11) . . ? 
  
_diffrn_measured_fraction_theta_max    0.955 
_diffrn_reflns_theta_full              28.24 
_diffrn_measured_fraction_theta_full   0.955 
_refine_diff_density_max    0.269 
_refine_diff_density_min   -0.244 
_refine_diff_density_rms    0.049 
